# Supplementary material for: Combining genetic and demographic monitoring better informs conservation of an endangered urban snake
Source: PLOS journal article supplement (doi:10.1371/journal.pone.0231744), 2020-05-05
Supplement: S2 (10.1371/journal.pone.0231744.s002) [file journal.pone.0231744.s002]

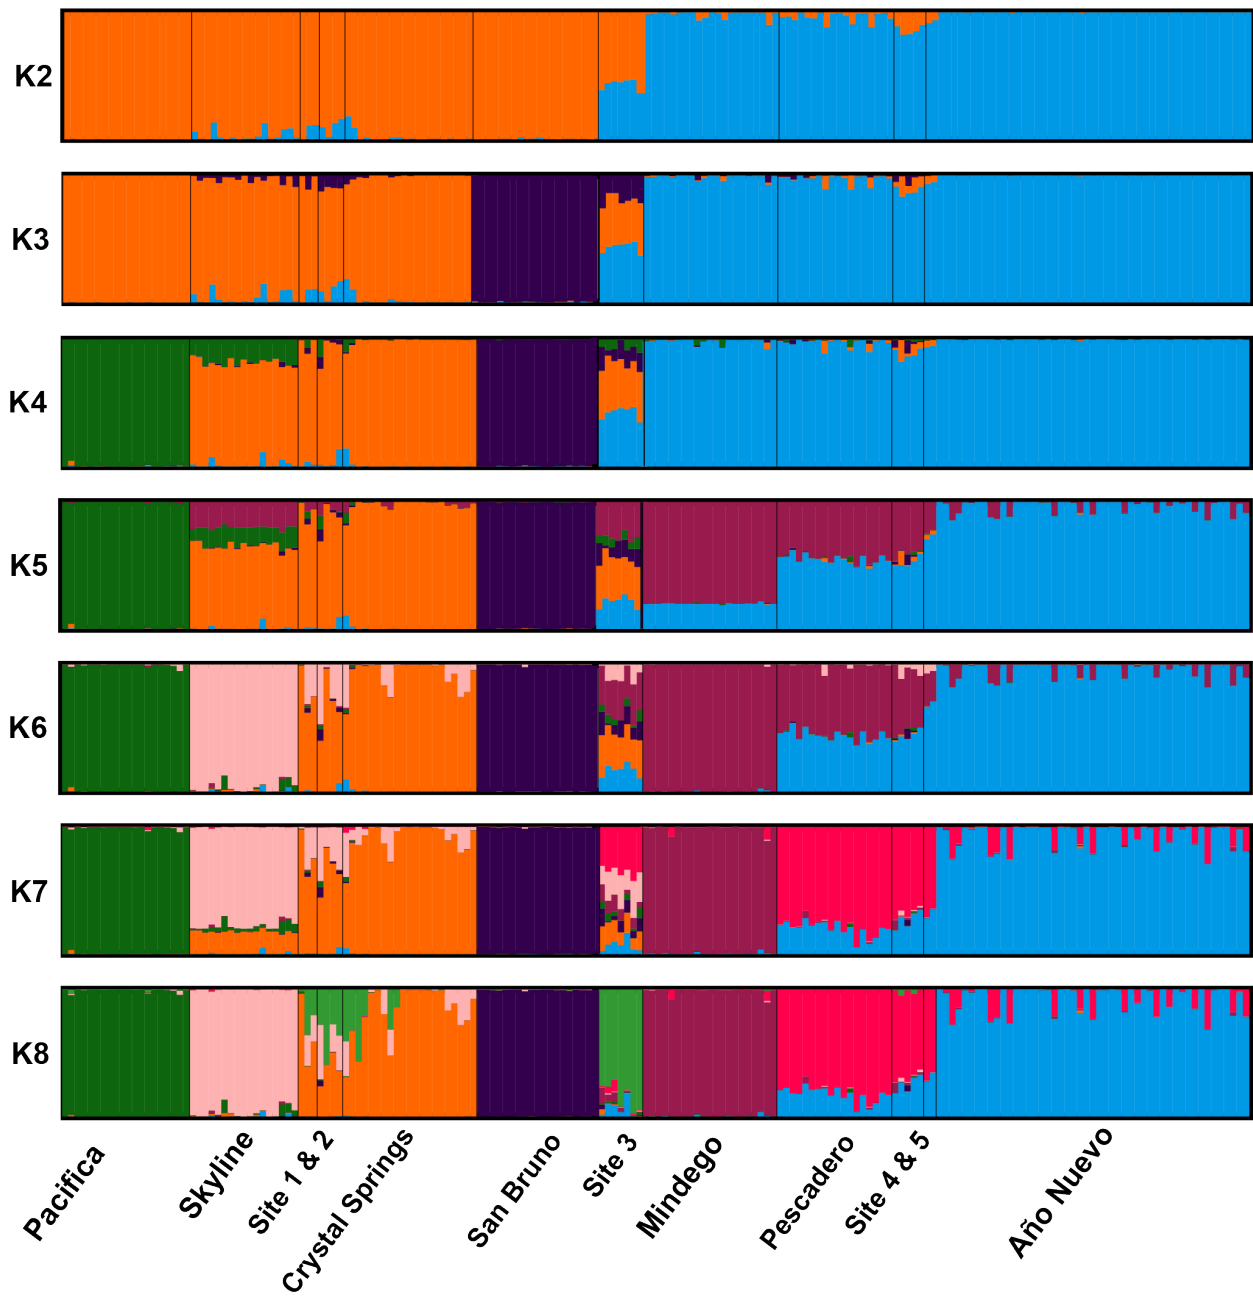

**S2 Figure.** STRUCTURE assignments of individuals for  $K = 2-8$  across all sites using the *T. s. tetrataenia* rangewide dataset.
